# Supplementary material
Source: ML conference proceedings conference paper supplement (https://proceedings.mlr.press/v115/she20a.html)
Supplement: Supplementary file [file she20a-supp.pdf]

---

# SUPPLEMENTARY MATERIALS

## NEURAL DYNAMICS DISCOVERY VIA GAUSSIAN PROCESS RECURRENT NEURAL NETWORKS, UAI 2019

---

**Qi She**  
Intel Labs China  
qi.she@intel.com

**Anqi Wu**  
Princeton Neuroscience Institute  
Princeton University  
anqiw@princeton.edu

### 1 Inference of GP-RNN with Poisson Response

Here we demonstrate more details with respect to the training procedure for the Poisson observation model. In details,  $p(\mathbf{F}|\bar{\mathbf{x}}, \bar{\mathbf{z}})$  is first approximated using Laplace approximation with  $q(\mathbf{F}|\bar{\mathbf{x}}, \bar{\mathbf{z}})$  over each  $\mathbf{f}_i$  as  $q(\mathbf{f}_i|\mathbf{x}_i, \bar{\mathbf{z}}) = \mathcal{N}(\hat{\mathbf{f}}_i, \Sigma^{-1})$  with mean and precision matrix computed as

$$\hat{\mathbf{f}}_i = \operatorname{argmax}_{\mathbf{f}_i} p(\mathbf{f}_i|\mathbf{x}_i, \bar{\mathbf{z}}), \quad (1)$$

$$\Sigma = -\nabla\nabla \log p(\mathbf{f}_i|\mathbf{x}_i, \bar{\mathbf{z}})|_{\mathbf{f}_i=\hat{\mathbf{f}}_i}, \quad (2)$$

where  $\Sigma$  is the Hessian of the negative log posterior. The optimization in eq. (1) can be realized by maximizing  $p(\mathbf{x}_i, \mathbf{f}_i|\bar{\mathbf{z}}) = p(\mathbf{x}_i|\mathbf{f}_i)p(\mathbf{f}_i|\bar{\mathbf{z}})$  using Bayes' rule, and we denote  $\Psi(\mathbf{f}_i) = \log p(\mathbf{x}_i, \mathbf{f}_i|\bar{\mathbf{z}})$ , and can get

$$\Psi(\mathbf{f}_i) = \log p(\mathbf{x}_i|\mathbf{f}_i) - \frac{1}{2}\mathbf{f}_i^\top \mathbf{K}_z \mathbf{f}_i - \frac{1}{2} \log |\mathbf{K}_z|, \quad (3)$$

where the first and second derivative with respect to  $\mathbf{f}_i$  is

$$\nabla \Psi(\mathbf{f}_i) = \nabla \log p(\mathbf{x}_i|\mathbf{f}_i) - \mathbf{K}_z^{-1} \mathbf{f}_i, \quad (4)$$

$$\nabla\nabla \Psi(\mathbf{f}_i) = \nabla\nabla \log p(\mathbf{x}_i|\mathbf{f}_i) - \mathbf{K}_z^{-1}. \quad (5)$$

Our goal is to obtain an Laplace approximation  $q(\mathbf{x}_i|\bar{\mathbf{z}})$  for the marginal likelihood  $p(\mathbf{x}_i|\bar{\mathbf{z}})$ , here we have

$$p(\mathbf{x}_i|\bar{\mathbf{z}}) = \int p(\mathbf{x}_i, \mathbf{f}_i|\bar{\mathbf{z}}) d\mathbf{f}_i = \int \exp(\Psi(\mathbf{f}_i)) d\mathbf{f}_i, \quad (6)$$

a Taylor expansion of  $\Psi(\mathbf{f}_i)$  around  $\hat{\mathbf{f}}_i$  is  $\Psi(\mathbf{f}_i) \simeq \Psi(\hat{\mathbf{f}}_i) - \frac{1}{2}(\mathbf{f}_i - \hat{\mathbf{f}}_i)^\top \Sigma(\mathbf{f}_i - \hat{\mathbf{f}}_i)$ , and thus an approximation  $q(\mathbf{x}_i|\bar{\mathbf{z}})$  to the marginal likelihood can be obtained

$$q(\mathbf{x}_i|\bar{\mathbf{z}}) = \exp(\hat{\Psi}) \int \exp\left(-\frac{1}{2}(\mathbf{f}_i - \hat{\mathbf{f}}_i)^\top \Sigma(\mathbf{f}_i - \hat{\mathbf{f}}_i)\right) d\mathbf{f}_i.$$

The Gaussian integral can be calculated analytically and we can obtain the approximated log marginal likelihood:

$$\log q(\mathbf{x}_i|\bar{\mathbf{z}}) = \log p(\mathbf{x}_i|\hat{\mathbf{f}}_i) - \frac{1}{2}(\hat{\mathbf{f}}_i^\top \mathbf{K}_z^{-1} \hat{\mathbf{f}}_i + \log |A|), \quad (7)$$

where  $A = |\mathbf{K}_z| |\mathbf{K}_z^{-1} \nabla\nabla \log p(\mathbf{x}_i|\hat{\mathbf{f}}_i)|$ . Then it is straightforward to get MAP estimation of  $\bar{\mathbf{z}}$  as

$$\bar{\mathbf{z}}_{\text{MAP}} = \operatorname{argmax}_{\bar{\mathbf{z}}} \sum_{i=1}^N \log q(\mathbf{x}_i|\bar{\mathbf{z}}) p(\bar{\mathbf{z}}). \quad (8)$$

We optimize eq. (1) and eq. (8) in a coordinate ascent manner iteratively. The results in the experiment section demonstrate that when having hybrid inference algorithms for  $\mathbf{F}$  and  $\bar{\mathbf{z}}$  update, we can obtain promising results.<sup>1</sup>

---

<sup>1</sup>The process is efficient, *e.g.* for 50 observational dimensions and 500 time points, recovery of 5-dimensional latent trajectories takes 5 mins until convergence. All experiments were run on a quad-core Intel i5 with 6GB RAM.

Algorithm 2 summarizes the inference method for the Poisson observation model based on MAP.

---

**Algorithm 1** Inference of GP-RNN-Poisson

---

**Input:** dataset  $\mathbf{x}_{1:T}$

**Output:** latent process  $\mathbf{z}_{1:T}$ , tuning curve  $\mathbf{f}_{1:N}$ , model parameters  $\Theta = \{\rho, \sigma, \theta, \psi\}$

**repeat**

**for**  $i = 1 : N$  **do**

    Compute the posterior mode  $\hat{\mathbf{f}}_i$ , and the precision matrix  $\Sigma$  via solving eq. (3), and get  $q(\mathbf{f}_i | \mathbf{x}_i, \bar{\mathbf{z}}) = \mathcal{N}(\hat{\mathbf{f}}_i, \Sigma^{-1})$

    Compute the new approximated log marginal likelihood  $\log q(\mathbf{x}_i | \bar{\mathbf{z}})$  as eq. (7).

**end for**

  Solve  $\bar{\mathbf{z}}_{\text{MAP}} = \text{argmax}_{\bar{\mathbf{z}}} \sum_{i=1}^N \log q(\mathbf{x}_i | \bar{\mathbf{z}}) p(\bar{\mathbf{z}})$  (eq. (8))

  Compute  $\Theta = \text{argmax}_{\Theta} p(\bar{\mathbf{x}}, \Theta; \bar{\mathbf{z}}_{\text{MAP}}, \mathbf{f}_{1:N})$  using SGD

**until** convergence

---

## 2 Further Results of Latent Dynamics Recovery Compared to SOTAs

All the results below are the recovery of three-dimensional lorenz dynamics from gaussian or poisson noisy data (black line is the true dynamics, the red line is the estimated dynamics from high-dimensional neural responses). The results are compared with the SOTAs, and can be easily reproduced using our uploaded .ipynb files.

### 2.1 GP-RNN (ours) VS PGPLVM (NIPS2017)[1]

Please refer to Fig. 1 and Fig. 2 for comparisons of the two models with 500 data points.

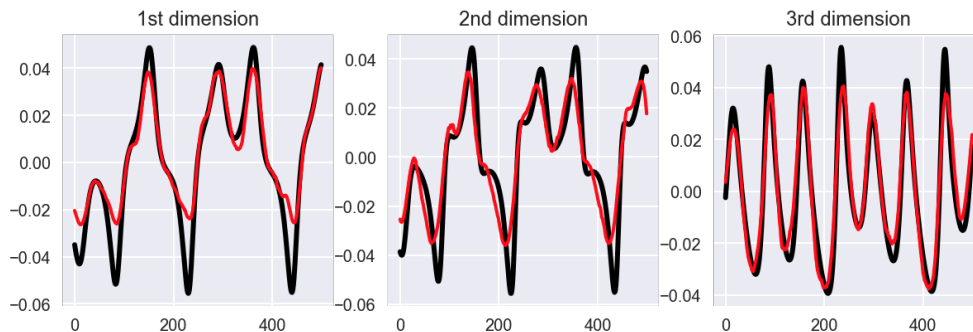

Figure 1: The model is “rnn dyn” (rnn dynamic model) with “gp map” (Gaussian process mapping function), the simulated process is “Lorenz dynamics” + “sin”(sinusoid mapping) + “poisson” response. The data points is 500, and the number of simulated neurons is 50.

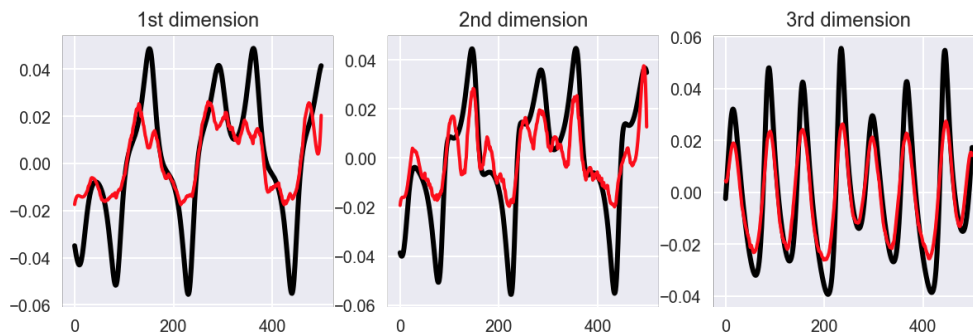

Figure 2: The model is “ar1 dyn” (1st order autoregressive dynamic model) with “gp map” (Gaussian process mapping function), the simulated process is “Lorenz dynamics” + “sin”(sinusoid mapping) + “poisson” response. The data points is 500, and the number of simulated neurons is 50.

## 2.2 GP-RNN (ours) VS PFLDS (NIPS2016) [2]

Please refer to Fig. 3 and Fig. 4 for comparisons of the two models with 200 data points.

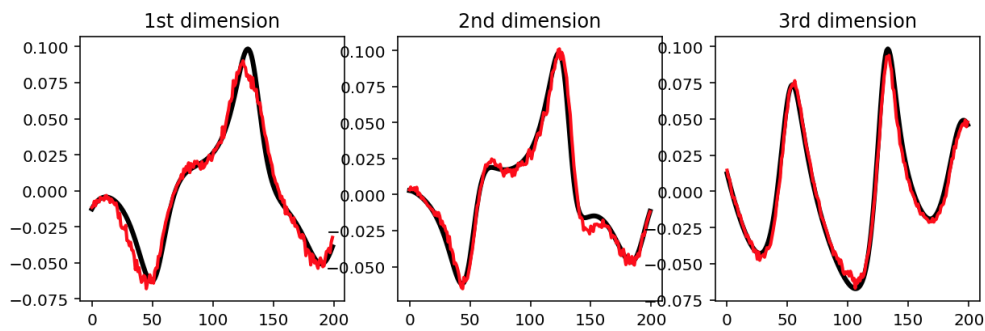

Figure 3: The model is “rnn dyn” (rnn dynamic model) with “gp map” (Gaussian process mapping function), the simulated process is “Lorenze dynamics” + “sin”(sinusoid mapping) + “poisson” response. The data points is 200, and the number of simulated neurons is 50.

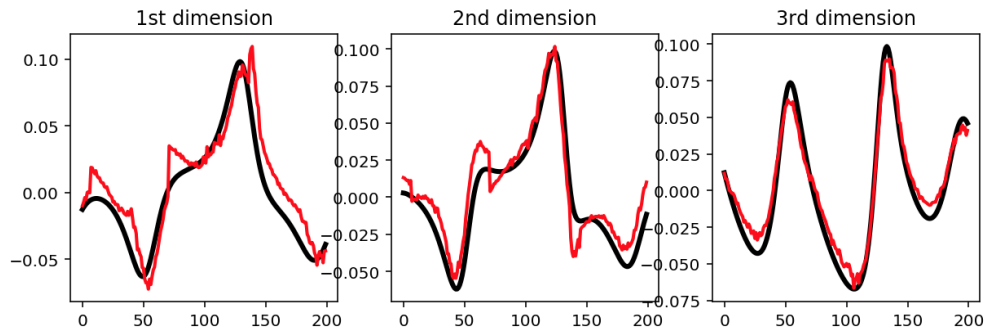

Figure 4: The model is “ar1 dyn” (1st order autoregressive dynamic model) with “nn map” (neural network mapping function), the simulated process is “Lorenze dynamics” + “sin”(sinusoid mapping) + “poisson” response. The data points is 200, and the number of simulated neurons is 50.

## 2.3 GP-RNN (ours) VS LFADS (Nature methods 2018) [3]

Please refer to Fig. 5 and Fig. 6 for comparisons of the two models with 200 data points. Note that for fair comparison, we implement LFADS ourselves so that we can control the variants effectively.

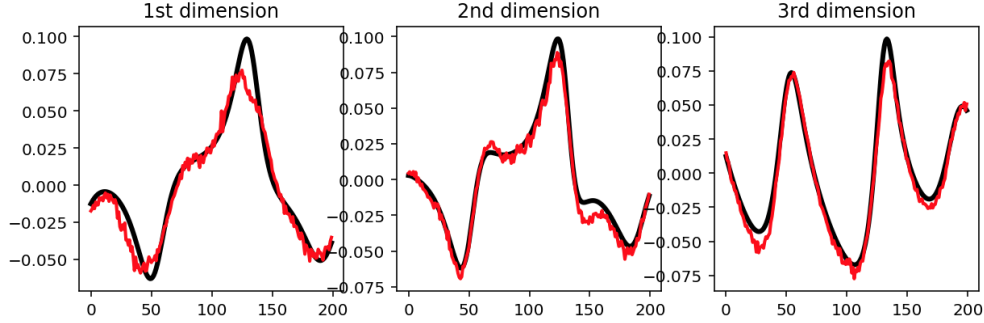

Figure 5: The model is “rnn dyn” (rnn dynamic model) with “gp map” (Gaussian process mapping function), the simulated process is “Lorenze dynamics” + “tanh”(sinusoid mapping) + “poisson” response. The data points is 200, and the number of simulated neurons is 50.

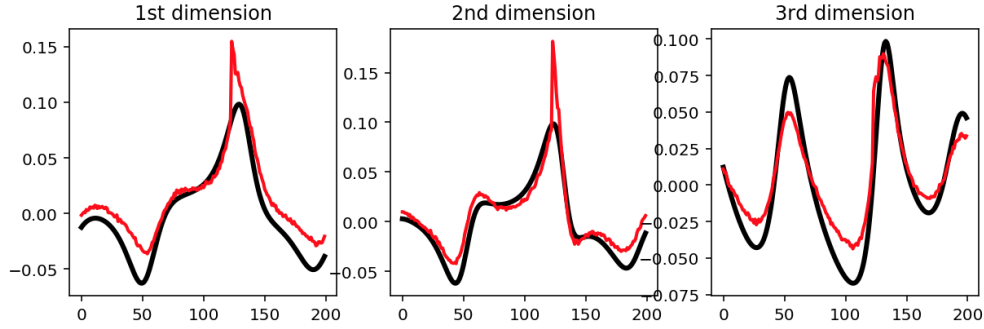

Figure 6: The model is “rnn dyn” (rnn dynamic model) with “nn map” (neural network mapping function), the simulated process is “Lorenze dynamics” + “tanh”(sinusoid mapping) + “poisson” response. The data points is 200, and the number of simulated neurons is 50.

### 3 Further Results w.r.t. Sample Perturbation

The tables in the main paper are shown averaged RMSE without standard errors due to page limit, please find more details as shown below.

| Gaussian | AR1-GPLVM   |             |             |             |                           |
|----------|-------------|-------------|-------------|-------------|---------------------------|
|          | MF          | VAE         | r-LSTM      | l-LSTM      | bi-LSTM                   |
| linear   | 4.12 ± 0.16 | 4.10 ± 0.16 | 4.01 ± 0.16 | 3.27 ± 0.13 | <b><u>1.64 ± 0.06</u></b> |
| tanh     | 3.20 ± 0.11 | 3.22 ± 0.13 | 3.01 ± 0.13 | 2.46 ± 0.13 | <b><u>1.17 ± 0.05</u></b> |
| sine     | 3.12 ± 0.13 | 3.12 ± 0.13 | 2.74 ± 0.12 | 2.33 ± 0.12 | <b><u>1.02 ± 0.04</u></b> |

Table 1: (More details for original paper Table 3) Inference network and dynamical model analysis. Root mean square error (**RMSE**,  $10^{-2}$ ) and standard error (**ste**,  $10^{-2}$ ) of latent trajectories reconstructed from various simulated models are presented. First-order autoregressive (AR1) is shown with three mapping functions: linear, tanh and sine, and five variational approximations. The observations are Gaussian responses with 50 observational dimensions and 200 time points. Underlined and bold fonts indicate best performance.

| Gaussian | GP-RNN      |             |             |             |                           |
|----------|-------------|-------------|-------------|-------------|---------------------------|
|          | MF          | VAE         | r-LSTM      | l-LSTM      | bi-LSTM                   |
| linear   | 2.17 ± 0.08 | 2.17 ± 0.08 | 1.98 ± 0.08 | 1.54 ± 0.06 | <b><u>0.96 ± 0.06</u></b> |
| tanh     | 2.01 ± 0.08 | 2.01 ± 0.08 | 1.83 ± 0.07 | 1.41 ± 0.06 | <b><u>0.78 ± 0.05</u></b> |
| sine     | 1.81 ± 0.08 | 1.78 ± 0.08 | 1.34 ± 0.06 | 1.12 ± 0.06 | <b><u>0.56 ± 0.03</u></b> |

Table 2: (More details for original paper Table 3) Inference network and dynamical model analysis. Root mean square error (**RMSE**,  $10^{-2}$ ) and standard error (**ste**,  $10^{-2}$ ) of latent trajectories reconstructed from various simulated models are presented. Recurrent neural network (e.g., LSTM) is shown with three mapping functions: linear, tanh and sine, and five variational approximations. The observations are Gaussian responses with 50 observational dimensions and 200 time points. Underlined and bold fonts indicate best performance.

| Poisson | ARI-GPLVM   |             |             |             |                           |
|---------|-------------|-------------|-------------|-------------|---------------------------|
|         | MF          | VAE         | r-LSTM      | l-LSTM      | bi-LSTM                   |
| linear  | 6.34 ± 0.25 | 6.34 ± 0.25 | 6.02 ± 0.22 | 5.71 ± 0.20 | <b><u>3.67 ± 0.15</u></b> |
| tanh    | 3.22 ± 0.13 | 3.21 ± 0.13 | 3.01 ± 0.13 | 2.84 ± 0.12 | <b><u>1.57 ± 0.07</u></b> |
| sine    | 2.80 ± 0.12 | 2.79 ± 0.12 | 2.77 ± 0.12 | 2.51 ± 0.11 | <b><u>1.49 ± 0.06</u></b> |

Table 3: (More details for original paper Table 4) Root mean square error (**RMSE**,  $10^{-2}$ ) and standard error (**ste**,  $10^{-2}$ ) of latent trajectories reconstructed from Poisson responses in test datasets. Underlined and bold fonts highlight best performance.

| Poisson | GP-RNN      |             |             |             |                           |
|---------|-------------|-------------|-------------|-------------|---------------------------|
|         | MF          | VAE         | r-LSTM      | l-LSTM      | bi-LSTM                   |
| linear  | 6.01 ± 0.20 | 6.01 ± 0.20 | 5.94 ± 0.20 | 5.71 ± 0.21 | <b><u>3.10 ± 0.13</u></b> |
| tanh    | 3.09 ± 0.15 | 3.11 ± 0.15 | 2.98 ± 0.13 | 2.54 ± 0.13 | <b><u>1.21 ± 0.04</u></b> |
| sine    | 2.67 ± 0.13 | 2.67 ± 0.13 | 2.43 ± 0.11 | 2.33 ± 0.10 | <b><u>1.14 ± 0.04</u></b> |

Table 4: (More details for original paper Table 4) Root mean square error (**RMSE**,  $10^{-2}$ ) and standard error (**ste**,  $10^{-2}$ ) of latent trajectories reconstructed from Poisson responses in test datasets. Underlined and bold fonts highlight best performance.

| # Data points | linear                    |             | tanh                      |                           | sine                      |                           |
|---------------|---------------------------|-------------|---------------------------|---------------------------|---------------------------|---------------------------|
|               | GP                        | NN          | GP                        | NN                        | GP                        | NN                        |
| N = 50        | <b><u>2.51 ± 0.11</u></b> | 3.88 ± 0.24 | <b><u>1.45 ± 0.06</u></b> | 2.75 ± 0.20               | <b><u>1.97 ± 0.10</u></b> | 3.43 ± 0.22               |
| N = 100       | <b><u>1.27 ± 0.06</u></b> | 1.65 ± 0.15 | <b><u>1.15 ± 0.04</u></b> | 1.45 ± 0.14               | <b><u>1.03 ± 0.04</u></b> | 1.31 ± 1.14               |
| N = 200       | <b><u>0.96 ± 0.03</u></b> | 1.29 ± 0.07 | <b><u>0.78 ± 0.03</u></b> | 1.22 ± 0.06               | <b><u>0.56 ± 0.03</u></b> | 0.70 ± 0.05               |
| N = 500       | <b><u>0.34 ± 0.02</u></b> | 0.35 ± 0.02 | <b><u>0.26 ± 0.01</u></b> | <b><u>0.26 ± 0.01</u></b> | <b><u>0.12 ± 0.01</u></b> | <b><u>0.12 ± 0.01</u></b> |

Table 5: (More details for original paper Table 5) Mapping function analysis. **RMSE** ( $10^{-2}$ ) and standard error (**ste**,  $10^{-2}$ ) of latent trajectory reconstruction using Gaussian process (GP-RNN) and neural network (NN-RNN) mapping functions are shown. Both of them are combined with an RNN dynamical model component. We simulate 50 trials and present averaged **RMSE** results across all trials. Linear, tanh and sine mapping functions are used to generate the data. “ $N$ ” indicates the number of data points for training in each trial, and **RMSE** is the result of subsequent 50 time points for testing.

| Dimension | PLDS         | GCLDS        | PfLDS        | P-GPFA       | P-GPLVM      | GP-RNN                     |
|-----------|--------------|--------------|--------------|--------------|--------------|----------------------------|
| $z_1$     | 0.641 ± 0.10 | 0.435 ± 0.14 | 0.698 ± 0.07 | 0.733 ± 0.05 | 0.784 ± 0.06 | <b><u>0.869 ± 0.02</u></b> |
| $z_2$     | 0.547 ± 0.12 | 0.364 ± 0.17 | 0.659 ± 0.06 | 0.720 ± 0.05 | 0.785 ± 0.06 | <b><u>0.873 ± 0.02</u></b> |
| $z_3$     | 0.903 ± 0.02 | 0.755 ± 0.07 | 0.797 ± 0.06 | 0.960 ± 0.01 | 0.966 ± 0.01 | <b><u>0.971 ± 0.01</u></b> |

Table 6: (More details for original paper Table 6)  $R^2$  (best possible score is 1.0) values and standard error (**ste**) of our method and other state-of-the-art methods for the prediction of Lorenz-based spike trains. The included methods are Poisson linear dynamical system (PLDS), generalized count linear dynamical system (GCLDS), Poisson feed-forward neural network linear dynamical system (PfLDS), and Poisson-Gaussian process latent variable model (P-GPLVM). GP-RNN recovers more variance of the latent Lorenz dynamics, as measured by  $R^2$  between the linearly transformed estimation of each model and the true Lorenz dynamics.

| Dim | PLDS            | P-GPFA          | LFADS           | PfLDS           | P-GPLVM         | GP-RNN                            |
|-----|-----------------|-----------------|-----------------|-----------------|-----------------|-----------------------------------|
| 2   | $0.68 \pm 0.15$ | $0.69 \pm 0.10$ | $0.73 \pm 0.17$ | $0.73 \pm 0.14$ | $0.74 \pm 0.15$ | <b><math>0.77 \pm 0.13</math></b> |
| 4   | $0.69 \pm 0.15$ | $0.72 \pm 0.12$ | $0.74 \pm 0.16$ | $0.73 \pm 0.13$ | $0.75 \pm 0.14$ | <b><math>0.78 \pm 0.14</math></b> |
| 6   | $0.72 \pm 0.17$ | $0.73 \pm 0.15$ | $0.74 \pm 0.20$ | $0.74 \pm 0.13$ | $0.77 \pm 0.10$ | <b><math>0.80 \pm 0.10</math></b> |
| 8   | $0.74 \pm 0.15$ | $0.74 \pm 0.10$ | $0.75 \pm 0.15$ | $0.75 \pm 0.14$ | $0.77 \pm 0.16$ | <b><math>0.80 \pm 0.10</math></b> |
| 10  | $0.75 \pm 0.15$ | $0.74 \pm 0.12$ | $0.77 \pm 0.17$ | $0.76 \pm 0.13$ | $0.77 \pm 0.15$ | <b><math>0.81 \pm 0.12</math></b> |

Table 7: (More details for original paper Table 7) Predictive  $R^2$  with and standard error (**ste**) on neural spiking activity of test dataset. The column “Dim” indicates the dimension of latent process  $\mathbf{z}$ . GP-RNN has consistently the best performance when increasing predefined latent dimensions.

## References

- [1] Anqi Wu, Nicholas A Roy, Stephen Keeley, and Jonathan W Pillow. Gaussian process based nonlinear latent structure discovery in multivariate spike train data. In *Advances in neural information processing systems*, pages 3496–3505, 2017.
- [2] Yuanjun Gao, Evan W Archer, Liam Paninski, and John P Cunningham. Linear dynamical neural population models through nonlinear embeddings. In *Advances in neural information processing systems*, pages 163–171, 2016.
- [3] Chethan Pandarinath, Daniel J O’Shea, Jasmine Collins, Rafal Jozefowicz, Sergey D Stavisky, Jonathan C Kao, Eric M Trautmann, Matthew T Kaufman, Stephen I Ryu, Leigh R Hochberg, et al. Inferring single-trial neural population dynamics using sequential auto-encoders. *Nature methods*, page 1, 2018.
